# Supplementary material for: Switchable metal-to-half-metal transition at the semi-hydrogenated graphene/ferroelectric interface
Source: Royal Society of Chemistry journal article supplement (doi:10.1039/c9nr08627g), 2020-01-01
Supplement: c9nr08627g1.pdf [file c9nr08627g1.pdf]

## Supporting Information

### Switchable metal-to-half-metal transition at semi-hydrogenated graphene/ferroelectric interface

Yajun Zhang<sup>a,b</sup>, Xu He<sup>b</sup>, Minglei Sun<sup>c</sup>, Jie Wang<sup>\*a</sup> and Philippe Ghosez<sup>\*b</sup>

<sup>a</sup>Department of Engineering Mechanics & Key Laboratory of Soft Machines and Smart Devices of Zhejiang Province, Zhejiang University, 38 Zheda Road, Hangzhou 310027, China.

<sup>b</sup>Theoretical Materials Physics, Q-MAT, CESAM, University of Liège, B-4000 Liège, Belgium.

<sup>c</sup>School of Materials Science and Engineering, Southeast University, Nanjing, Jiangsu 211189, China.

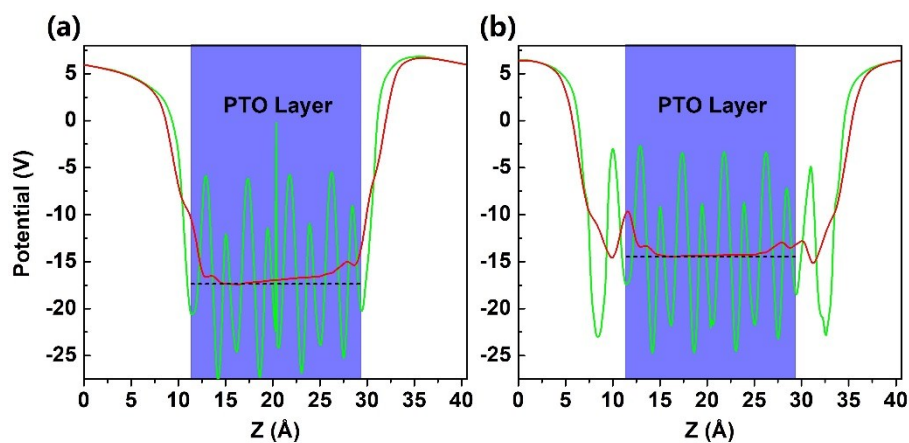

Fig. S1. Planar average (green line) and the macroscopic average (red line) electrostatic potential along (001) direction for (a)  $\text{PbTiO}_3$  slab and the corresponding Graphone/ $(\text{PbO-TiO}_2)_m\text{PbO}$ /Graphone heterostructures ( $m = 4$ ).

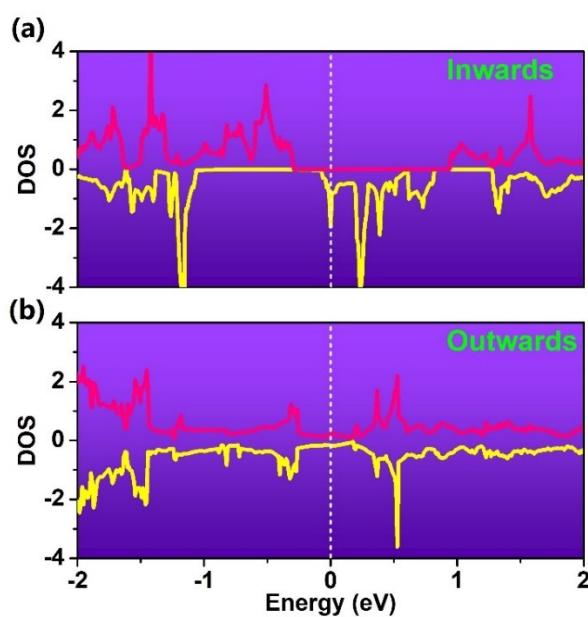

Fig. S2. Density of states of graphone layer with inwards and outwards polarization in Graphone/(PbO-TiO<sub>2</sub>)<sub>m</sub>PbO/Graphone heterostructures with m = 8.

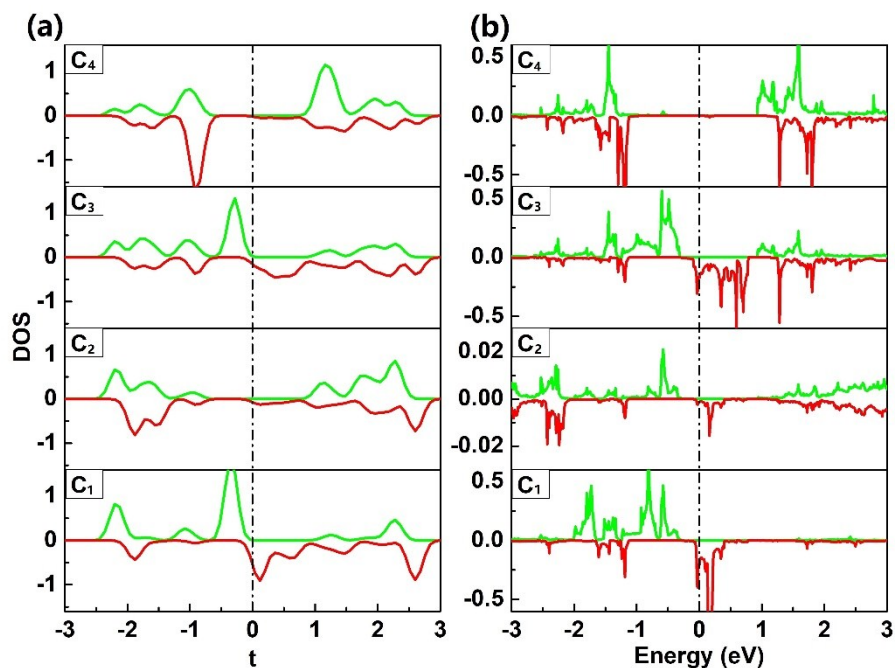

Fig. S3. Comparison of the density of states for C atoms from C<sub>1</sub> to C<sub>4</sub> between results from (a) Hubbard model and (b) first-principles calculations.

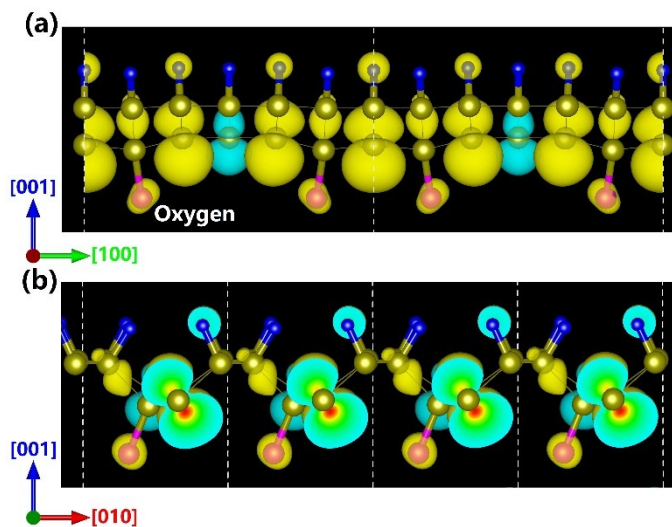

Fig. S4. Spin charge density at the interface of graphone/(PbO-TiO<sub>2</sub>)<sub>m</sub>-PbO/graphone heterostructures with outwards polarization in the (a) (010) and (b) (100) plane, respectively, the yellow (cyan) color indicates isosurfaces of spin-up (spin-down) densities of 0.005  $\mu_B/\text{bohr}^3$ .

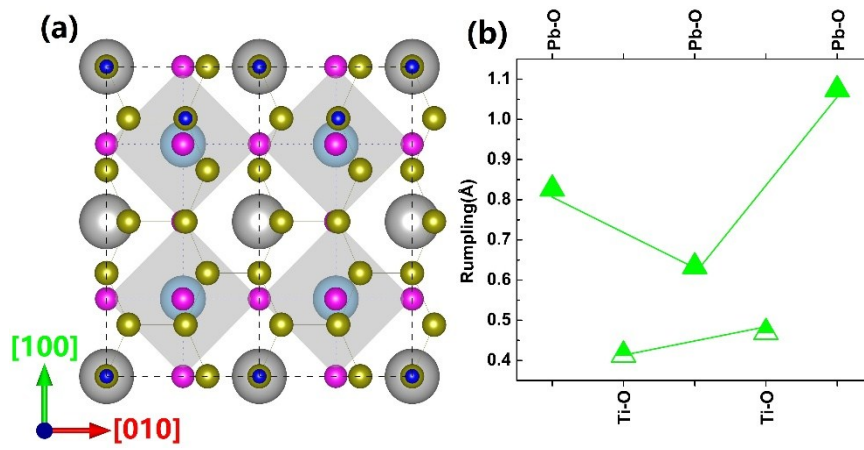

Fig. S5. (a) Top view of graphene/PbTiO<sub>3</sub> heterostructures with one H atom per PTO unit cell area absorbed on top of graphene, (b) rumpling of the heterostructures with two layers PbTiO<sub>3</sub>.
